# Supplementary material for: Lipase Addition Promoted the Growth of Proteus and the Formation of Volatile Compounds in Suanzhayu, a Traditional Fermented Fish Product
Source: MDPI journal article supplement (doi:10.3390/foods10112529), 2021-10-21
Supplement: s1 [file s1]

## Supplementary data

### **Lipase addition promoted the growth of *Proteus* and the formation of volatile compounds in *Suanzhayu*, a traditional fermented fish product**

Cuicui Jiang <sup>a</sup>, Mengyang Liu<sup>a</sup>, Xu Yan <sup>a</sup>, Ruiqi Bao<sup>a</sup>, Aoxue Liu<sup>a</sup>, Wenqing Wang<sup>a</sup>, Zuoli Zhang<sup>a</sup>, Huipeng Liang <sup>a</sup>, Chaofan Ji<sup>a</sup>, Sufang Zhang<sup>a</sup>, Xinping Lin

<sup>a,\*</sup>

<sup>a</sup> *National Engineering Research Center of Seafood, Collaborative Innovation Center of Provincial and ministerial co-construction for Seafood Deep Processing, Liaoning Province Collaborative Innovation Center for Marine Food Deep Processing, School of Food Science and Technology, Dalian Polytechnic University, Dalian 116034, People's Republic of China*

\* Corresponding authors:

Xinping Lin, *National Engineering Research Center of Seafood, Collaborative Innovation Center of Provincial and ministerial co-construction for Seafood Deep Processing, Liaoning Province Collaborative Innovation Center for Marine Food Deep Processing, School of Food Science and Technology, Dalian Polytechnic University, Dalian 116034, People's Republic of China.*

Tel.: +86041186318675; fax: +86041186318655. E-mail: [yingchaer@163.com](mailto:yingchaer@163.com)

**Table S1** Alpha diversity indices of bacteria in *Suanzhayu* with and without lipase.

| Sample   | OTUs | ACE    | Chao1  | Simpson | Shannon | Coverage (%) | Sample   | OTUs |
|----------|------|--------|--------|---------|---------|--------------|----------|------|
| 0d       | 220  | 220.61 | 220.17 | 0.05    | 4.08    | 99.99        | 0d       | 220  |
| U0-3d    | 172  | 230.59 | 233.88 | 0.16    | 2.36    | 99.87        | U0-3d    | 172  |
| U0-5d    | 145  | 177.84 | 171.25 | 0.13    | 2.53    | 99.91        | U0-5d    | 145  |
| U0-7d    | 157  | 195.03 | 186.25 | 0.11    | 2.67    | 99.91        | U0-7d    | 157  |
| U0-14d   | 270  | 274.42 | 276.88 | 0.02    | 4.65    | 99.97        | U0-14d   | 270  |
| U100-3d  | 202  | 239.78 | 239.28 | 0.17    | 2.35    | 99.96        | U100-3d  | 202  |
| U100-5d  | 224  | 256.09 | 277.26 | 0.24    | 2.08    | 99.96        | U100-5d  | 224  |
| U100-7d  | 252  | 274.19 | 283.20 | 0.14    | 2.45    | 99.97        | U100-7d  | 252  |
| U100-14d | 255  | 286.77 | 300.04 | 0.12    | 2.65    | 99.96        | U100-14d | 255  |

**Table S2** Concentration of volatile compounds in *Suanzhayu* with or without lipase.

| Volatile compounds  | RT   | Content (µg/ kg) |              |              |               |              |               |               |               |              |
|---------------------|------|------------------|--------------|--------------|---------------|--------------|---------------|---------------|---------------|--------------|
|                     |      | 0d               | U0-3d        | U0-5d        | U0-7d         | U0-14d       | U100-3d       | U100-5d       | U100-7d       | U100-14d     |
| <i>Aldehyde (7)</i> |      |                  |              |              |               |              |               |               |               |              |
| pentanal            | 699  | 319.8±28.6       | 122.7±17.7   | 184.3±0.4    | 586.6±10.5    | 437.2±3.6    | 170.2±31.0    | 288.0±1.0     | 229.0±1.7     | 671.2±71.0   |
| hexanal             | 800  | 7394.9±1173.7    | 8152.8±124.5 | 7305.1±277.5 | 10729.2±450.6 | 4992.6±27.0  | 10583.7±692.2 | 12868.2±344.4 | 7536.0±981.3  | 6931.7±303.5 |
| heptanal            | 901  | 148.9±30.1       | 245.8±12.8   | 238.6±14.3   | 376.0±24.1    | 319.3±47.8   | 298.5±0.9     | 423.3±26.1    | 398.1±42.8    | 359.4±28.8   |
| benzaldehyde        | 962  | ND               | 49.3±2.5     | 182.4±6.4    | 207.4±17.3    | 230.8±11.9   | 71.2±17.6     | 224.1±4.9     | 237.5±82.1    | 253.5±1.0    |
| (E)-2-heptenal      | 958  | ND               | 162.2±1.2    | 145.4±2.1    | 167.9±0.6     | 243.4±8.0    | 169.4±9.1     | 198.1±12.5    | 227.4±13.2    | 215.6±16.1   |
| octanal             | 1003 | 146.3±28.1       | 270.0±24.1   | 443.4±50.0   | 489.7±1.9     | 387.0±20.4   | 319.6±8.5     | 502.7±14.3    | 641.6±67.7    | 839.3±11.4   |
| nonanal             | 1104 | 200.2±25.5       | 434.5±16.8   | 328.0±51.6   | 473.8±91.5    | 391.7±24.2   | 713.9±85.1    | 559.6±31.8    | 551.9±93.4    | 300.1±2.6    |
| subtotal            |      | 8210.0±1286.0    | 9437.9±136.2 | 8827.1±372.9 | 13030.7±574.3 | 7002.0±119.7 | 12326.4±824.4 | 15064.1±288.5 | 9821.4±1114.6 | 9570.8±255.0 |
| <i>Alcohols (6)</i> |      |                  |              |              |               |              |               |               |               |              |
| 3-methyl-1-butanol  | 736  | ND               | 65.4±3.2     | 177.1±5.8    | 107.6±4.8     | 546.2±64.7   | 48.1±7.5      | 1014.8±134.8  | 1961.4±11.7   | 1903.9±104.0 |
| 1-pentanol          | 765  | ND               | 117.9±9.1    | 228.7±16.9   | 308.2±21.8    | 303.6±9.5    | 118.4±2.9     | 186.3±14.6    | 180.3±23.0    | 259.2±67.1   |

|                                 |      |             |              |             |              |              |              |              |              |              |
|---------------------------------|------|-------------|--------------|-------------|--------------|--------------|--------------|--------------|--------------|--------------|
| 1-hexanol                       | 868  | 98.5±26.8   | 699.7±113.5  | 1881.7±51.3 | 2731.1±125.9 | 3938.3±238.8 | 413.5±290.7  | 1942.1±29.2  | 3022.5±153.2 | 2795.9±31.8  |
| 1-octene-3-<br>alcohol          | 980  | 624.8±171.8 | 1853.4±108.5 | 1356.7±5.2  | 2067.6±337.1 | 1829.7±27.7  | 2229.0±7.8   | 2926.8±15.2  | 2020.2±113.2 | 1794.1±53.1  |
| 2,4-dimethyl-<br>cyclohexanol   | 1032 | ND          | 65.9±1.3     | 41.0±10.1   | 63.6±16.6    | 130.0±2.2    | 59.6±8.7     | 101.0±8.5    | 93.3±15.1    | 86.8±11.6    |
| (Z)-5-octen-<br>1-alcohol       | 1056 | ND          | 64.2±2.5     | 32.8±6.2    | 43.0±11.6    | 110.0±21.4   | 62.6±1.6     | 65.7±0.7     | 46.7±8.7     | 31.0±1.0     |
| Subtotal                        |      | 723.3±198.7 | 2866.5±226.8 | 3718.0±64.9 | 5321.1±222.4 | 6857.8±247.2 | 2931.2±301.0 | 6236.6±155.6 | 7324.4±324.9 | 6870.9±134.3 |
| <hr/>                           |      |             |              |             |              |              |              |              |              |              |
| <i><b>Ester (2)</b></i>         |      |             |              |             |              |              |              |              |              |              |
| ethyl ester<br>hexanoic<br>acid | 1000 | ND          | ND           | 28.9±4.8    | 33.5±3.2     | 24.7±4.7     | ND           | 21.4±2.9     | 79.5±4.6     | 199.9±0.0    |
| ethyl ester<br>octanoic acid    | 1196 | ND          | ND           | ND          | ND           | ND           | ND           | 6.5±1.0      | 12.4±0.1     | 76.2±0.8     |
| Subtotal                        |      | ND          | ND           | 28.9±4.8    | 33.5±3.2     | 24.7±4.7     | ND           | 27.9±2.0     | 91.8±4.5     | 276.1±0.8    |
| <hr/>                           |      |             |              |             |              |              |              |              |              |              |
| <i><b>Others (6)</b></i>        |      |             |              |             |              |              |              |              |              |              |
| 2,3-<br>octanedione             | 984  | 300.3±63.7  | 93.5±29.5    | 457.8±60.1  | 707.1±41.0   | 396.1±26.5   | 84.0±6.6     | 393.1±73.9   | 658.6±103.0  | 415.7±0.0    |

|                               |      |               |               |               |               |              |               |              |                |               |
|-------------------------------|------|---------------|---------------|---------------|---------------|--------------|---------------|--------------|----------------|---------------|
| 2-pentyl-furan                | 993  | 67.6±6.7      | 141.9±19.2    | 408.8±83.7    | 614.7±138.5   | 447.9±60.4   | 316.6±133.0   | 374.2±13.4   | 869.5±104.7    | 438.3±5.9     |
| ethyl-pyrazine                | 921  | ND            | 91.9±4.4      | 246.3±31.9    | 224.9±33.4    | 163.1±21.0   | ND            | 202.4±8.7    | 242.5±65.9     | 216.1±12.0    |
| 2,3-dimethyl-pyrazine         | 925  | ND            | 50.1±5.1      | 194.3±11.9    | 214.2±19.6    | 90.2±0.8     | ND            | 95.5±8.6     | 87.2±30.9      | 101.7±31.7    |
| 2-ethyl-3-methyl-pyrazine     | 1004 | 16.7±3.7      | 95.7±10.3     | 314.0±0.6     | 115.6±7.5     | 377.6±6.5    | 38.0±6.4      | 142.0±17.6   | 209.1±33.0     | 217.1±43.3    |
| 2-ethyl-3,5-dimethyl-pyrazine | 1084 | 9.4±1.1       | 29.4±4.0      | 108.1±6.5     | 53.1±3.8      | 69.1±9.4     | 11.7±2.5      | 56.6±3.0     | 80.5±5.5       | 90.1±5.2      |
| Subtotal                      |      | 394.0±75.2    | 502.5±26.0    | 1729.3±130.9  | 1929.6±228.7  | 1544.1±139.1 | 450.4±130.7   | 1263.7±84.1  | 2147.3±343.0   | 1479.0±10.6   |
| Total                         |      | 9327.3±1559.8 | 12807.0±389.0 | 14303.4±573.6 | 20314.9±564.8 | 15428.5±16.4 | 15708.0±654.1 | 22592.3±46.8 | 19384.9±1778.0 | 18196.9±183.1 |

Values are represented as means ± SD (standard deviation).

ND represents not detected.

RI represents retention indices.

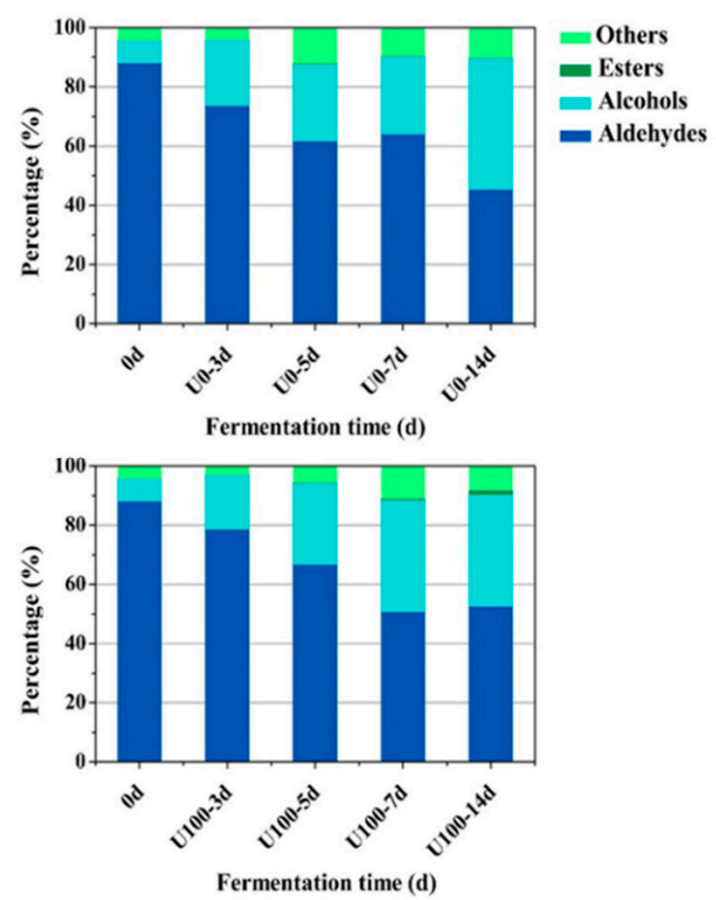

**Figure S1** The percentage of volatile compounds during the fermentation *Suanzhayu* samples without (U0) and with (U100) lipase.
